# Supplementary material
Source: Copernicus journal article supplement (doi:10.5194/egusphere-2026-2528)
Supplement: Supplementary file 1 [file egusphere-2026-2528-supplement.pdf]

Supplement of  
*High-Performance Geodynamics on GPUs Using the PETSc  
CUDA Backend (GAUZZ v1.0.0)*

Kyeong-Min Lee<sup>1</sup>, Deok-Kyu Jang<sup>3</sup>, Cedric Thieulot<sup>4</sup>, and Byung-Dal So<sup>1,2</sup>

<sup>1</sup>Interdisciplinary Program in Earth Environmental System Science & Engineering,  
Kangwon National University, Chuncheon, Republic of Korea

<sup>2</sup>Department of Geophysics, Kangwon National University, Chuncheon, Republic of  
Korea

<sup>3</sup>Research Institute for Mathematical Sciences, Kangwon National University,  
Chuncheon, Republic of Korea

<sup>4</sup>Department of Earth Sciences, Utrecht University, Princetonlaan 8A, The Netherlands

*Correspondence to:* Byung-Dal So (bdso@kangwon.ac.kr)

**Contents of this file**

- Figures S1 to S2
- Tables S1 to S4

**Introduction**

This document provides supplementary information to accompany the main manuscript, including benchmark velocity and pressure field plots, dimensional parameter tables, a pre-assembly memory table across 3D mesh resolutions, and a wall-time table for the 3D thermo-mechanical convection.

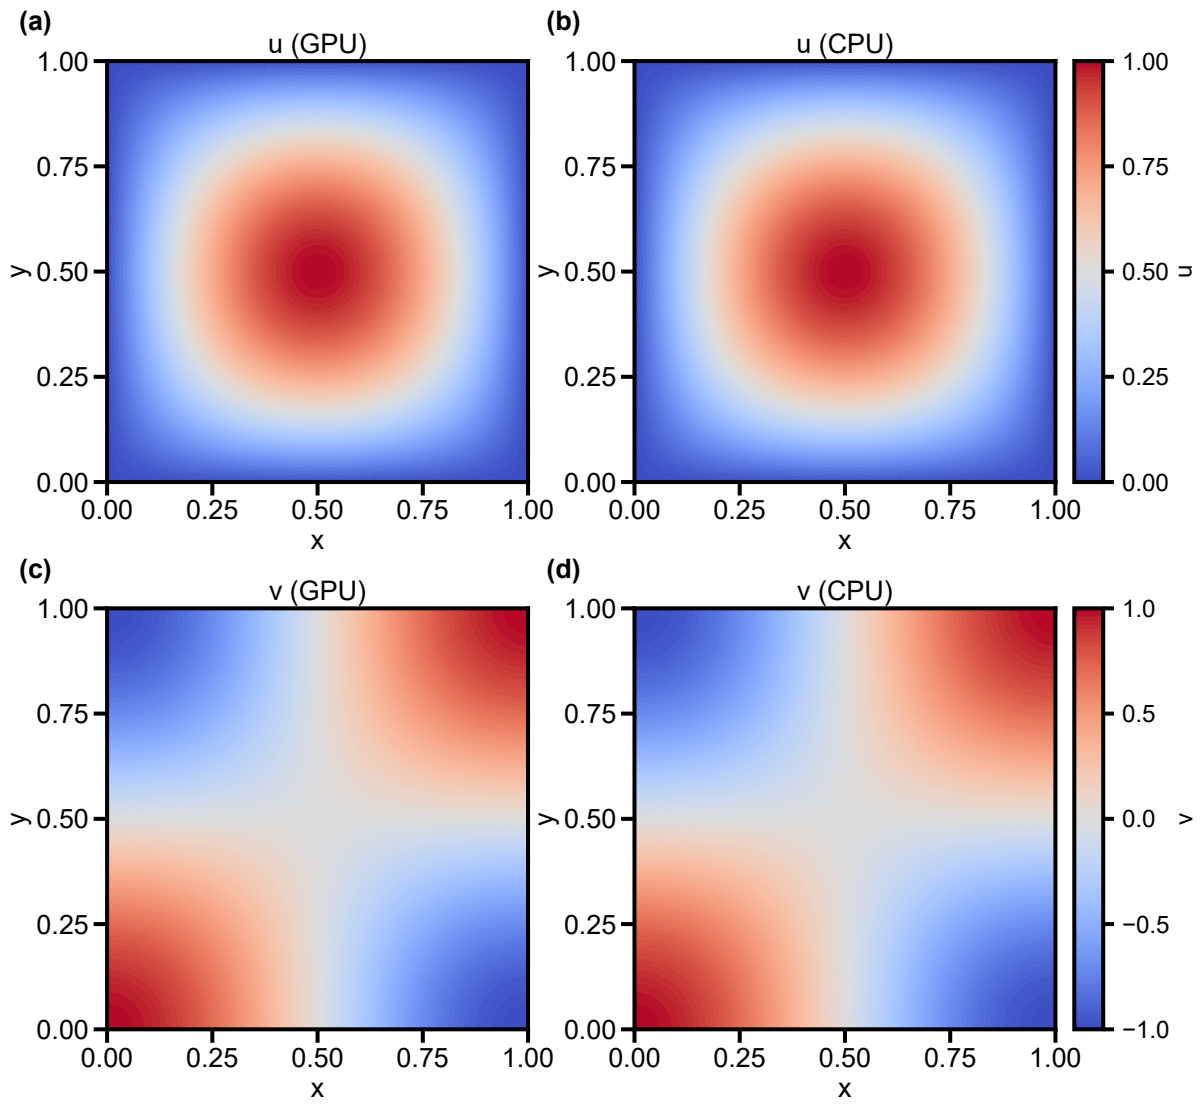

Figure S1: Velocity fields in the  $x$ -direction and  $y$ -direction from the velocity subproblem derived on the GPU (a and c) and CPU (b and d).

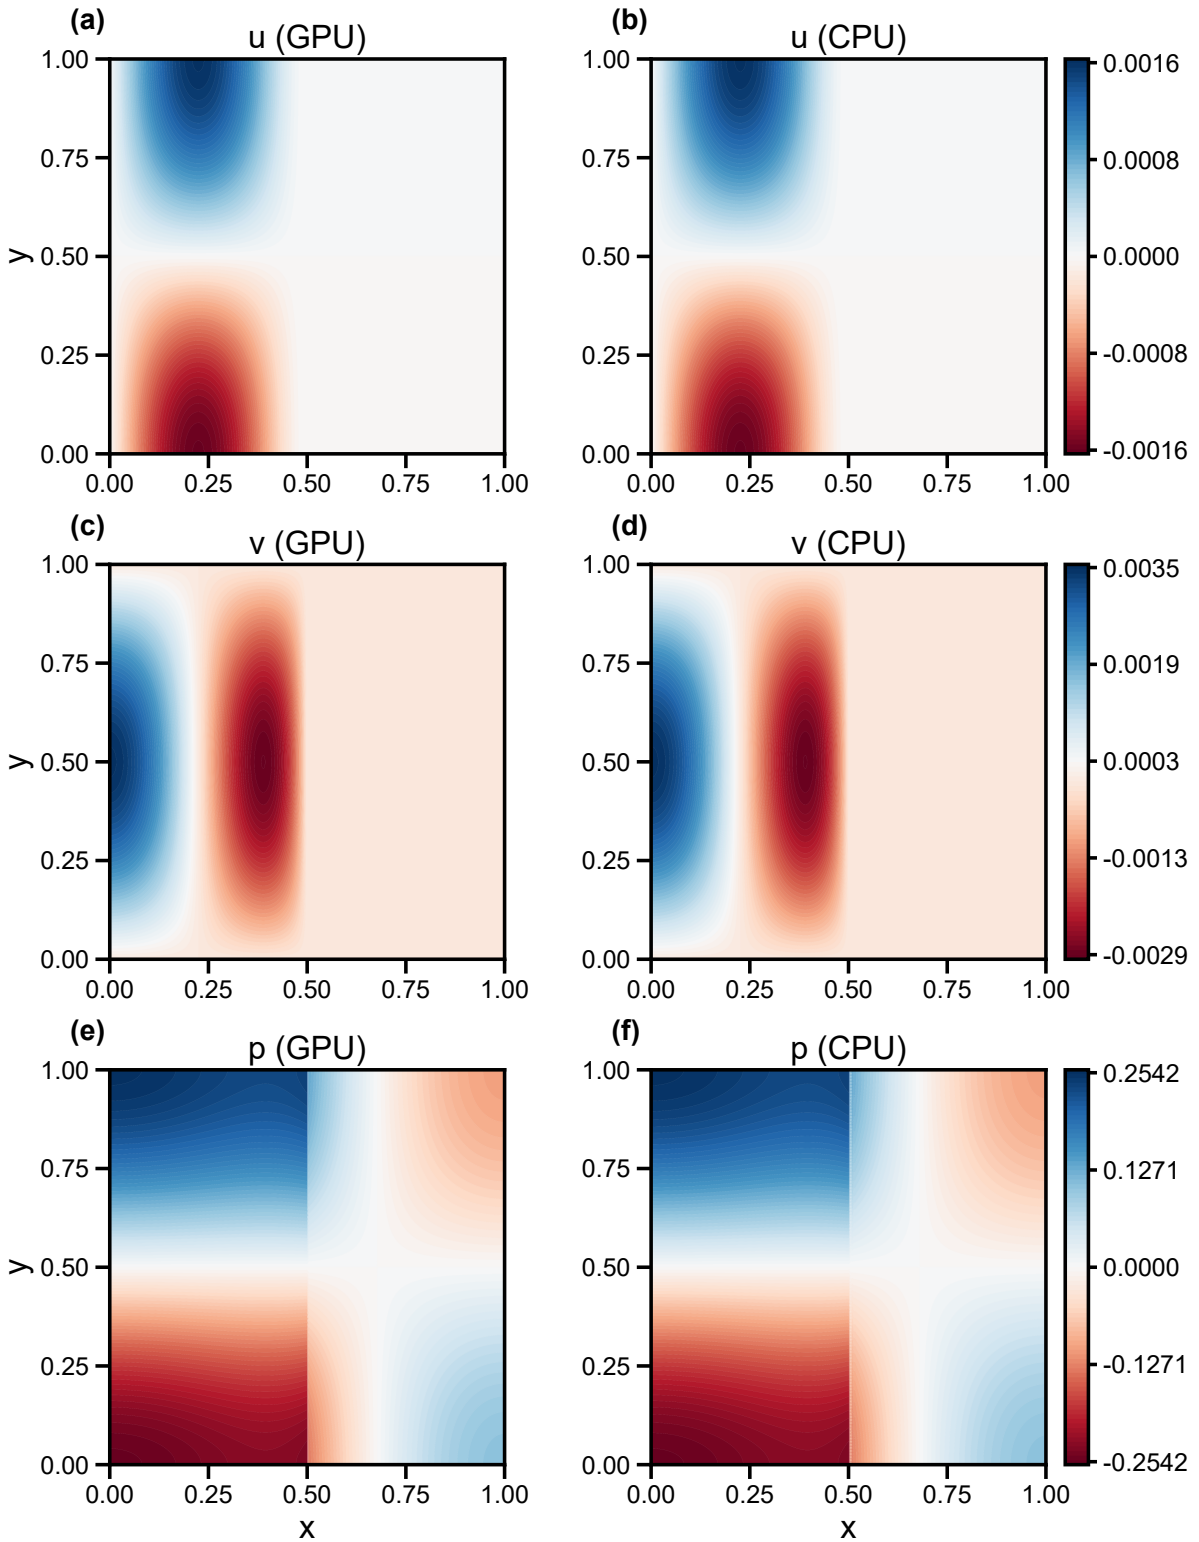

Figure S2: SolCx benchmark  $x$ - and  $y$ -velocity and pressure computed on the GPU (a, c, and e) and CPU (b, d, and f).

Table S1: Dimensional parameters for sticky-air benchmark.

| Descriptions               | Symbols  | Values                                    |
|----------------------------|----------|-------------------------------------------|
| Reference viscosity        | $\eta_0$ | $10^{18} \text{ Pa} \cdot \text{s}$       |
| Reference density          | $\rho_0$ | $0 \text{ kg} \cdot \text{m}^{-3}$        |
| Characteristic length      | $D$      | 800 km                                    |
| Thermal diffusivity        | $\kappa$ | $10^{-6} \text{ m}^2 \cdot \text{s}^{-1}$ |
| Gravitational acceleration | $g$      | $10 \text{ m} \cdot \text{s}^{-2}$        |

Table S2: Dimensional parameters for subduction model.

| Descriptions               | Symbols  | Values                                         |
|----------------------------|----------|------------------------------------------------|
| Reference viscosity        | $\eta_0$ | $3.5 \times 10^{23} \text{ Pa} \cdot \text{s}$ |
| Reference density          | $\rho_0$ | $3230 \text{ kg} \cdot \text{m}^{-3}$          |
| Characteristic length      | $D$      | 600 km                                         |
| Thermal diffusivity        | $\kappa$ | $10^{-6} \text{ m}^2 \cdot \text{s}^{-1}$      |
| Gravitational acceleration | $g$      | $10 \text{ m} \cdot \text{s}^{-2}$             |

Table S3: Comparison of DOFs and pre-assembly memory requirements for different mesh resolutions.

| Mesh resolution            | DOFs      | Memory for pre-assembly (MB) |
|----------------------------|-----------|------------------------------|
| $100 \times 15 \times 100$ | 3,352,864 | 510.0                        |
| $100 \times 20 \times 100$ | 4,456,884 | 680.0                        |
| $100 \times 25 \times 100$ | 5,560,904 | 850.0                        |
| $100 \times 30 \times 100$ | 6,664,924 | 1014.0                       |
| $100 \times 35 \times 100$ | 7,768,944 | 1176.0                       |
| $100 \times 40 \times 100$ | 8,872,964 | 1336.0                       |

Table S4: Comparison of computational wall times for 3D thermo-mechanical convection simulations across different hardware configurations (GPU, CPU) and ASPECT.

| 3D thermo-mechanical convection | GPU<br>(two-GPU, 16-core) | GPU<br>(single-GPU, 16-core) | CPU<br>(32-core) | ASPECT<br>(32-core) |
|---------------------------------|---------------------------|------------------------------|------------------|---------------------|
| Total wall time                 | 169.87 s                  | 239.99 s                     | 2855.62 s        | 2438.6 s            |
| Assemble Stokes                 | 0.04 s                    | 0.15 s                       | 0.18 s           | 616 s               |
| Mesh generation                 | 0.85 s                    | 0.74 s                       | 2.73 s           | 0.15 s              |
| Set up initial conditions       | 0.00 s                    | 0.00 s                       | 0.04 s           | 0.12 s              |
| Solve Stokes                    | 139.32 s                  | 200.76 s                     | 2782.39 s        | 1473 s              |
| Assemble temperature            | 6.60 s                    | 6.57 s                       | 5.11 s           | 166 s               |
| Solve temperature               | 19.35 s                   | 28.18 s                      | 65.56 s          | 66 s                |
